# Supplementary material for: Association between Prostinogen (KLK15) Genetic Variants and Prostate Cancer Risk and Aggressiveness in Australia and a Meta-Analysis of GWAS Data
Source: PubMed Central journal article supplement (PMC3223160; doi:10.1371/journal.pone.0026527), 2011-11-23
Supplement: pone.0026527.s001.pdf [file pone.0026527.s001.pdf]

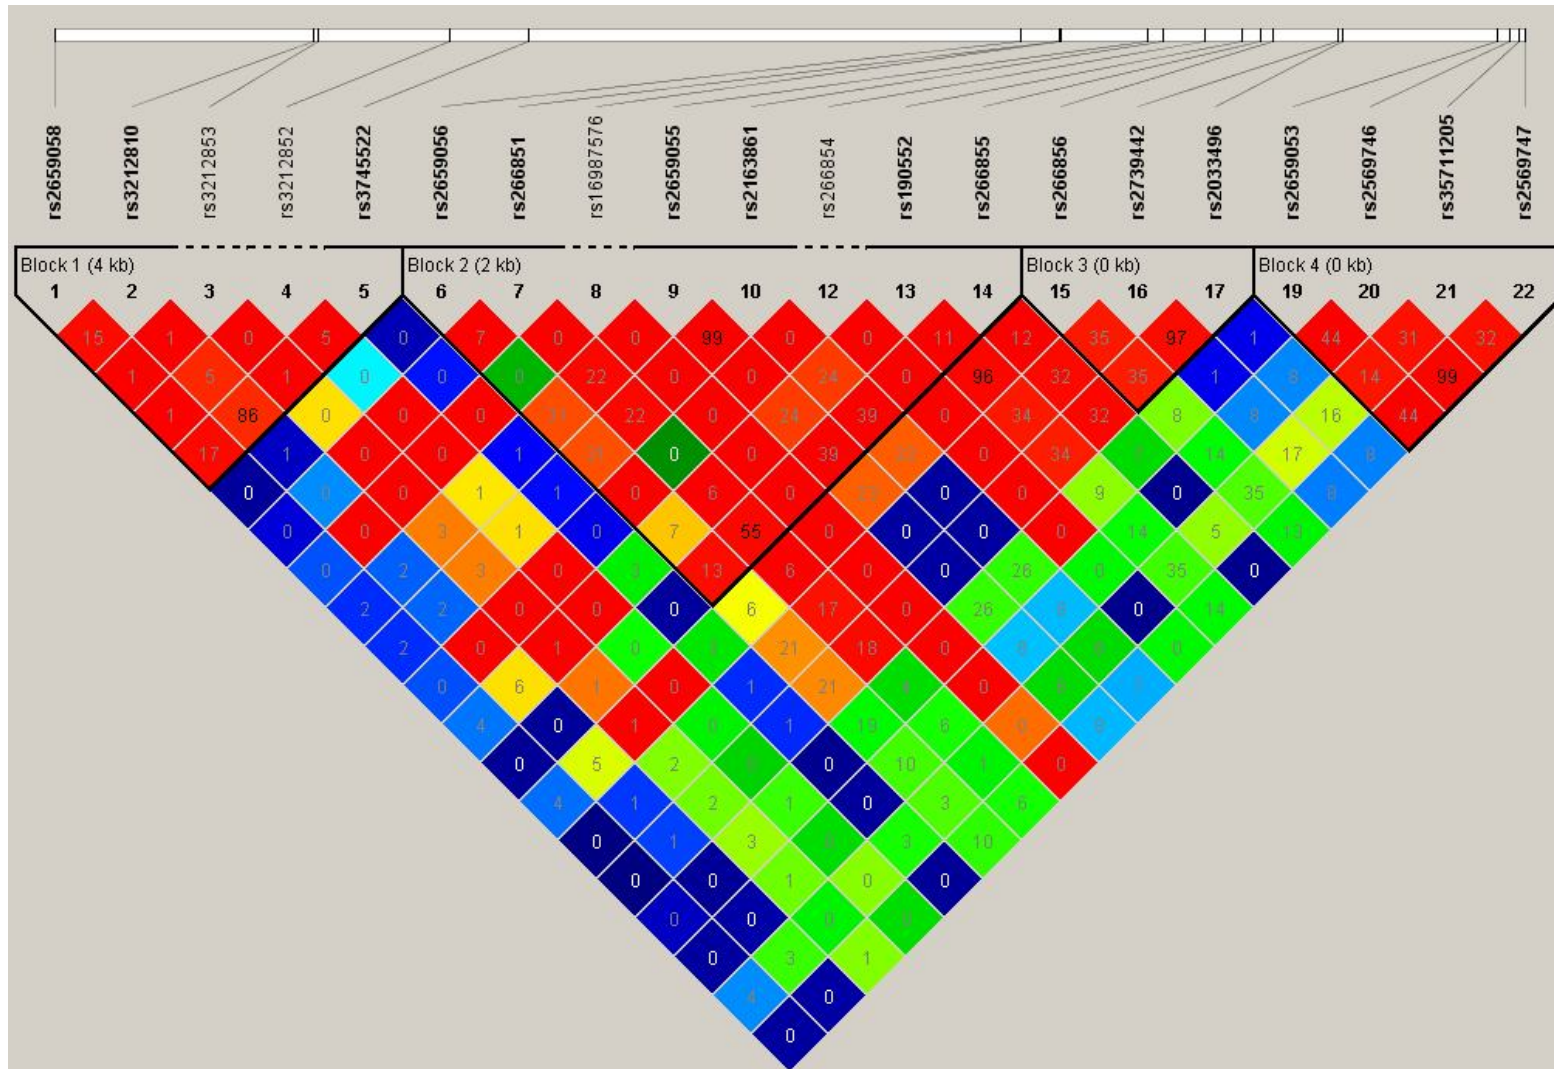

**Supplementary Figure 1:** Linkage Disequilibrium map generated by Haploview 4.2. Frequency data was generated for the control male individuals and the LD map was plotted. SNPs in **bold** were found to have frequencies >0.05.
